# Supplementary material for: Multi-geometric carbon encapsulated SnP3 composite for superior lithium/potassium ion batteries
Source: Royal Society of Chemistry journal article supplement (doi:10.1039/d4dt01616e), 2024-01-01
Supplement: d4dt01616e1.pdf [file d4dt01616e1.pdf]

## Supporting Information

### **Multi-geometric carbon encapsulated SnP<sub>3</sub> composite for superior lithium/potassium ion batteries**

Zhongliang Hu<sup>1</sup>, Xixia Zhao<sup>\*,1,2</sup>, Yanqing Zhao<sup>1</sup>, Qian Zhao<sup>1</sup>, Xin Zhao<sup>1</sup>, Guijuan Wei<sup>\*,1</sup>, Honglei Chen<sup>\*,1</sup>

<sup>1</sup>State Key Laboratory of Biobased Material and Green Papermaking, Key Laboratory of Pulp and Paper Science & Technology of Ministry of Education/Shandong Province, Faculty of Light Industry, Qilu University of Technology (Shandong Academy of Sciences), Jinan, 250353, P. R. China.

<sup>2</sup>School of Chemistry and Chemical Engineering, University of Jinan, Jinan, 250022, P. R. China.

\*Corresponding author

Email: zhaoxixia163@163.com; weitiansd@126.com; chenhonglei\_1982@163.com

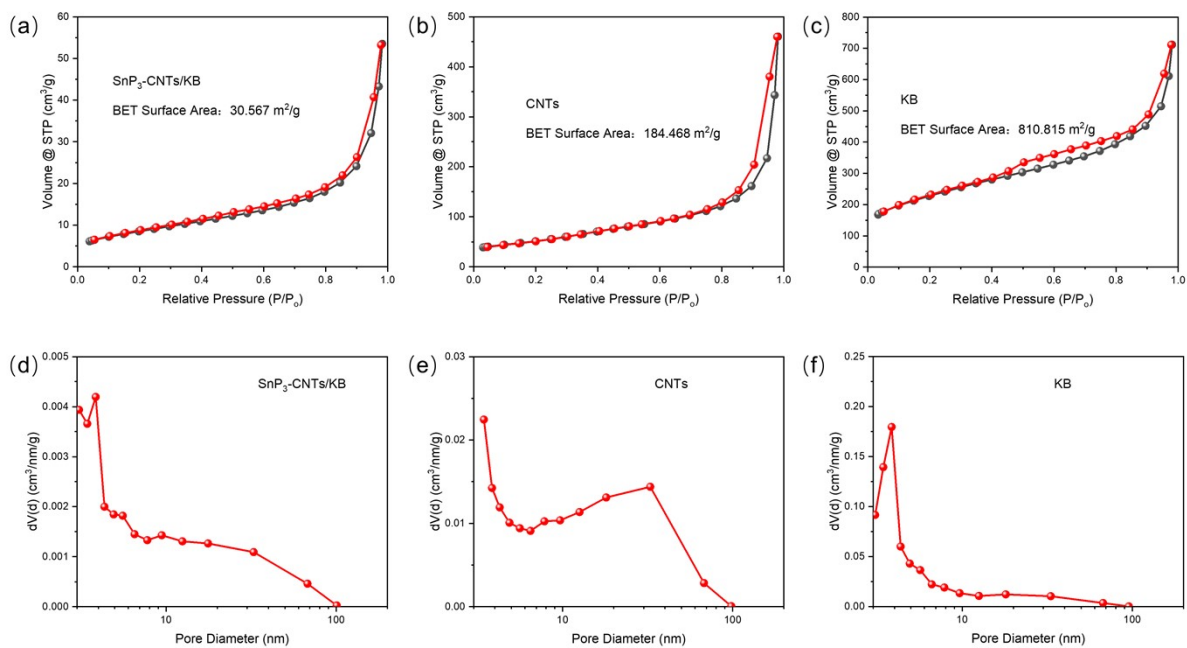

**Figure S1.** N<sub>2</sub> adsorption-desorption isotherms of (a) SnP<sub>3</sub>-CNTs/KB composite, (b) CNTs, and (c) KB. The pore size distribution of (d) SnP<sub>3</sub>-CNTs/KB composite, (e) CNTs, and (f)

KB.

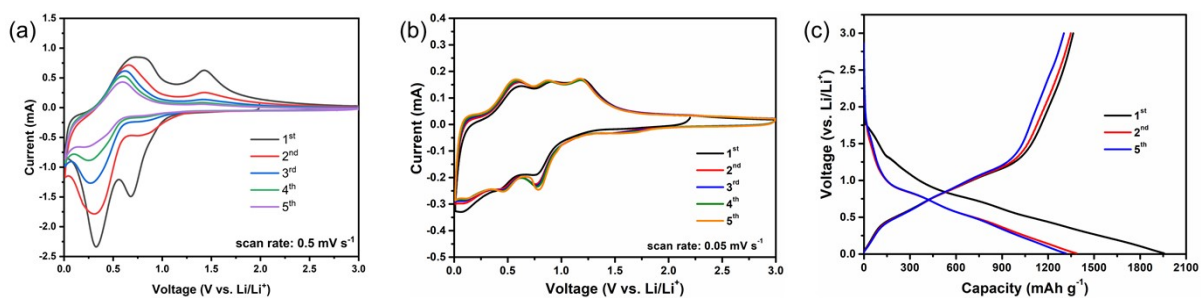

**Figure S2.** First five cycles of cyclic voltammograms of the as-prepared (a) SnP<sub>3</sub> particles at 0.5 mV s<sup>-1</sup> and (b) SnP<sub>3</sub>-CNTs/KB composite at 0.05 mV s<sup>-1</sup> in LIBs. (c) The 1<sup>st</sup>, 2<sup>nd</sup>, and 5<sup>th</sup> galvanostatic charge/discharge curves of the as-prepared SnP<sub>3</sub>-CNTs/KB composite at 50 mA g<sup>-1</sup> in LIBs.

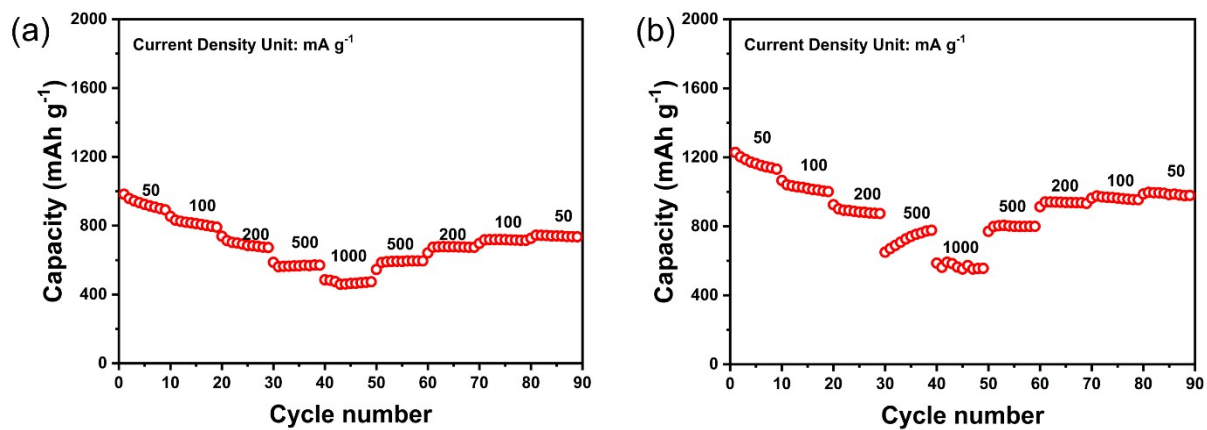

**Figure S3.** Rate performance of the (a) SnP<sub>3</sub>-CNTs composite and (b) the SnP<sub>3</sub>-KB composite.

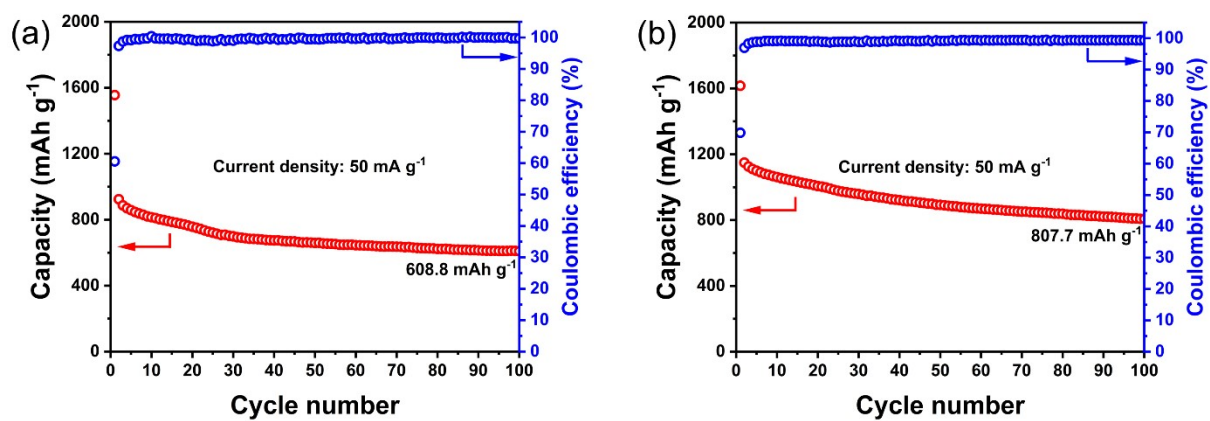

**Figure S4.** Cycling performance of the (a) SnP<sub>3</sub>-CNTs composite and (b) the SnP<sub>3</sub>-KB composite at 50 mA g<sup>-1</sup>.

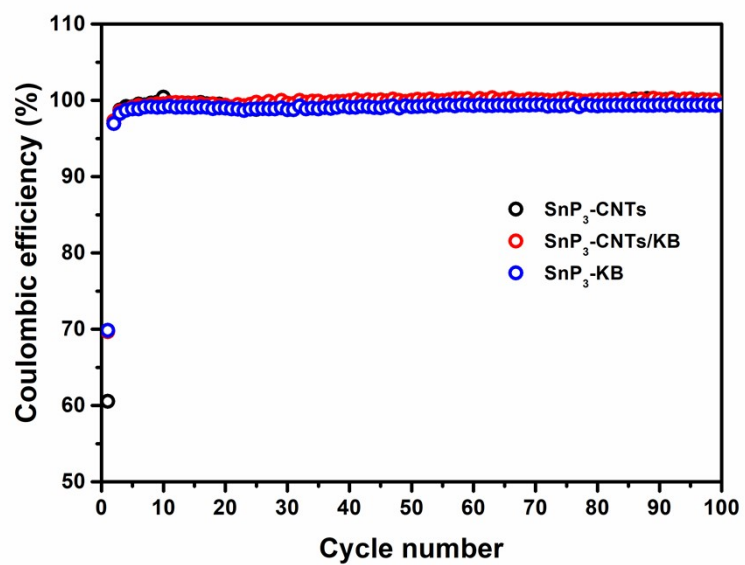

**Figure S5.** Coulombic efficiencies of SnP<sub>3</sub>-CNTs, SnP<sub>3</sub>-CNTs/KB, and SnP<sub>3</sub>-KB composites at 50 mA g<sup>-1</sup> in LIBs.

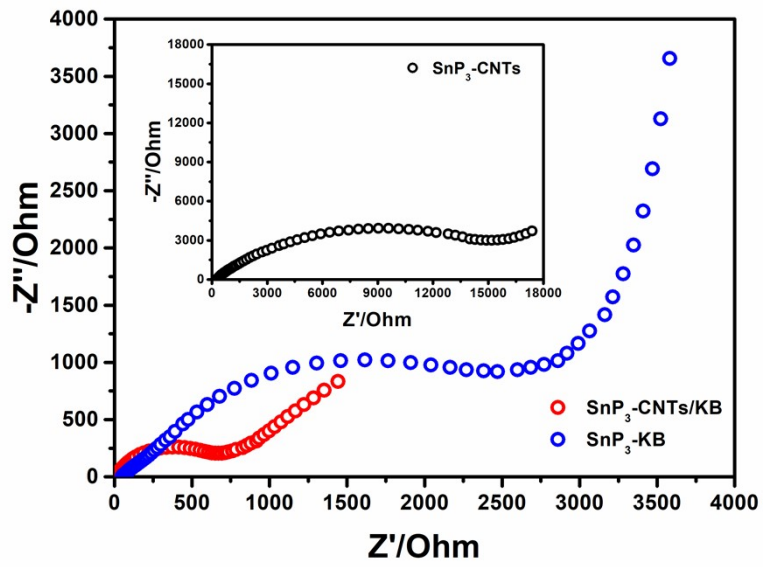

**Figure S6.** EIS Nyquist plots of SnP<sub>3</sub>-CNTs (inset), SnP<sub>3</sub>-CNTs/KB, and SnP<sub>3</sub>-KB composites in LIBs.

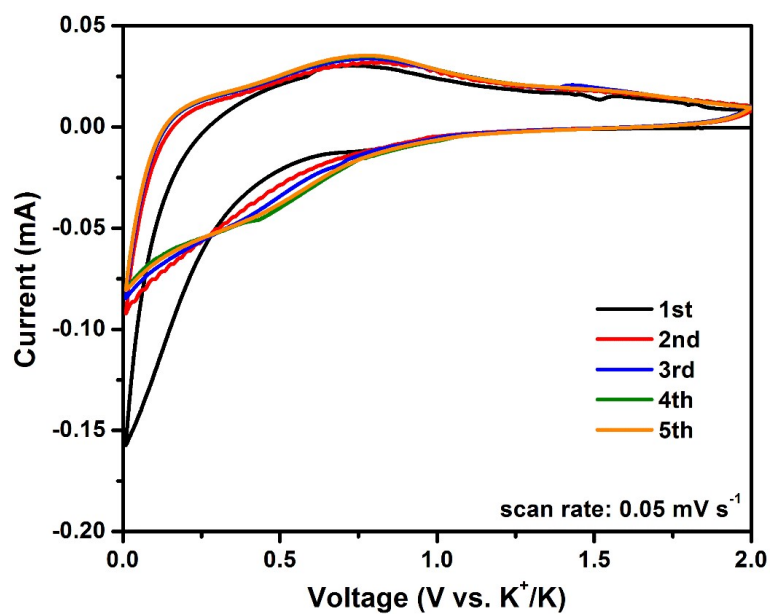

**Figure S7.** Cyclic voltammograms of first five cycles of the as-prepared SnP<sub>3</sub>-CNTs/KB composite at 0.05 mV s<sup>-1</sup> in PIBs.
